# Supplementary material
Source: publisher figshare collection journal article supplement (https://acs.figshare.com/ndownloader/files/12147050)
Supplement: Supplementary file 1 [file 12147050]

## Supporting Information

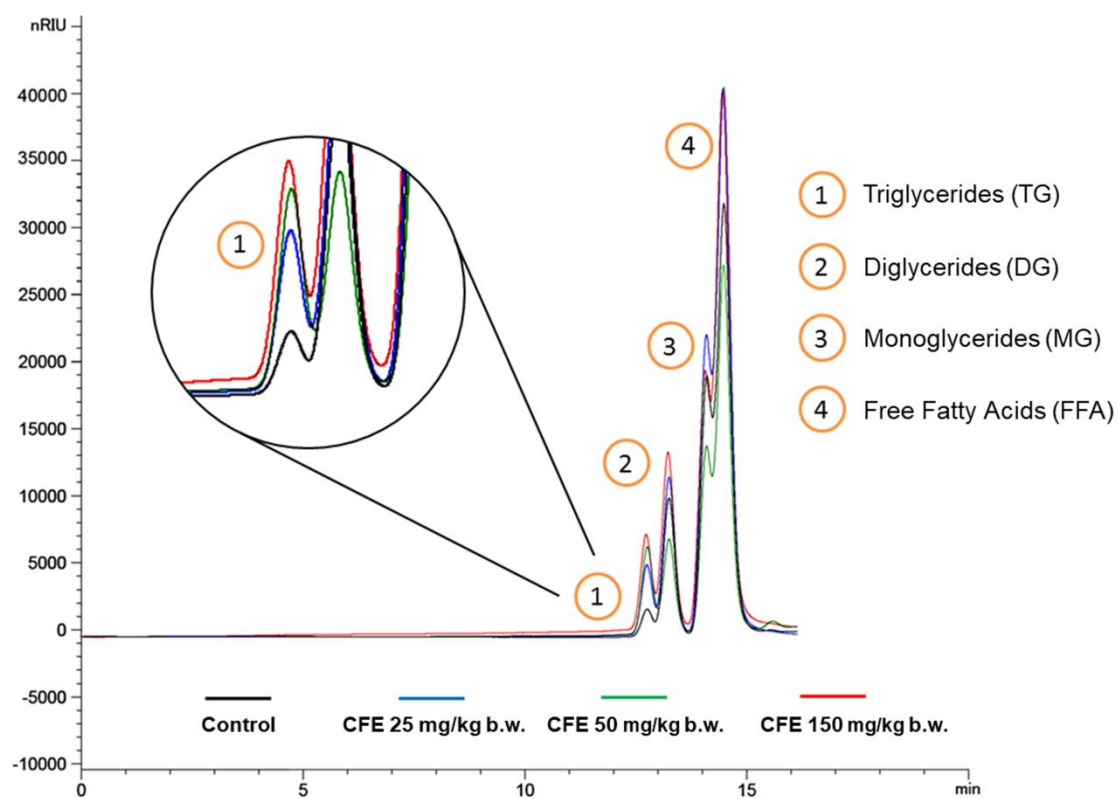

**Figure S1:** Superposition of the chromatograms of the different Carob Fruit Extracts (CFE) groups obtained by HPSEC. (1) Extension of the fraction corresponding to the triglycerides reveals the significant differences between control and CFE 150 mg/kg b.w., where a greater area of triglycerides is shown.
